# Supplementary material for: Antimicrobial and anti-inflammatory activity of Cystatin C on human gingival fibroblast incubated with Porphyromonas gingivalis
Source: PeerJ. 2022 Oct 25;10:e14232. doi: 10.7717/peerj.14232 (PMC9615962; doi:10.7717/peerj.14232)
Supplement: Supplemental Information 1 [file peerj-10-14232-s001.xlsx]

## Sheet: Hoja 1
TNF
Control	LPS	Peptidoglycan	Cystatin C	P. gingivalis	P. gingivalis/Cystatin C
0	1500	800	100	1200	300
0	1300	780	110	1000	400
0	1438	815	98	1000	300
0	1300	820	98	1500*	530
0	1489	800	85	1000	300
IL.1B
Control	LPS	Peptidoglycan	Cystatin C	P. gingivalis	P. gingivalis/Cystatin C
0	890	600	0	750	330
0	870	780	0	720	400
0	850	600	0	720	500
0	900	620	0	680	400
0	910	580	0	650	300
IL-10
Control	LPS	Peptidoglycan	Cystatin C	P. gingivalis	P. gingivalis/Cystatin C
300	150	100	534	230	890
300	180	90	520	222	870
150	160	70	544	223	850
270	160	95	500	210	820
280	160	102	530	200	800
ROS
Control	LPS	Peptidoglycan	Cystatin C	P. gingivalis	P. gingivalis / Cystatin C
200	7000	6500	4000	6500	2000
300	6800	6000	3900	6000	1500
300	6500	6200	3500	5900	2000
100	7200	6800	4200	6300	1330
400	5789	6745	4230	6000	1200
NITRITES
Control	LPS	Peptidoglycan	Cystatin C	P. gingivalis	P. gingivalis/Cystatin C
0	3.8	2.5	1	8.2	4.9
0	3	2	0.8	8.7	5
0	3.5	1.9	1.5	9	3.5
0	3	1.7	1.4	9.2	3.2
0	2.9	2.3	1.4	7.8	4
VIABILIDAD
Control	LPS	Peptidoglycan	Cystatin C	P. gingivalis	P. gingivalis / Cystatin C
98	100	100	100	100	100
98	100	99	98	80	95
98	98	98	99	95	98
95	98	95	95	90	97
94	99	99	100	85	97
CMI
Control						0.1						0.3						0.5						0.7						0.9
0.25	0.25	0.25	0.25	0.25		0.2	0.2	0.23	0.21	0.19		0.12	0.12	0.15	0.12	0.12		0.1	0.1	0.12	0.11	0.11		0.09	0.09	0.06	0.06	0.07		0.03	0.03	0.01	0.02	0.01
0.35	0.35	0.35	0.5	0.6		0.4	0.4	0.4	0.4	0.4		0.25	0.25	0.23	0.25	0.25		0.1	0.18	0.12	0.17	0.18		0.08	0.07	0.075	0.065	0.065		0.055	0.05	0.05	0.05	0.04
0.6	0.7	0.8	0.8	0.8		0.42	0.42	0.5	0.42	0.47		0.2	0.2	0.25	0.22	0.2		0.15	0.15	0.12	0.1	0.1		0.04	0.04	0.03	0.05	0.05		0.03	0.035	0.03	0.032	0.035
0.5	0.5	0.53	0.65	0.75		0.3	0.3	0.45	0.5	0.49		0.1	0.11	0.1	0.1	0.1		0.08	0.09	0.08	0.07	0.08		0.02	0.025	0.02	0.02	0.02		0.0015	0.015	0.02	0.02	0.018
