# Supplementary material for: Antimicrobial and anti-inflammatory activity of Cystatin C on human gingival fibroblast incubated with Porphyromonas gingivalis
Source: PeerJ. 2022 Oct 25;10:e14232. doi: 10.7717/peerj.14232 (PMC9615962; doi:10.7717/peerj.14232)
Supplement: Supplemental Information 2 — Effect of cystatin C on a) Porphyromonas gingivalis growth and b) Cell viability of HGFs. The results are expressed as mean ± SD of the average of five independent assays. Statistical differences are expressed as (*) p < 0.05 when compared to non-treated control P. gingivalis bacteria [file peerj-10-14232-s002.xlsx]

## Sheet: Hoja1
viability of hGfS
Control	0.1	0.3	0.5	0.7	0.9
98	99	99	99	99	99
98	99	99	98	80	95
97	98	98	99	95	98
99	98	95	95	90	97
94	99	99	100	85	97
CMI
Control						0.1						0.3						0.5						0.7						0.9
1 h	0.25	0.25	0.25	0.25	0.25		0.2	0.2	0.23	0.21	0.19		0.12	0.12	0.15	0.12	0.12		0.1	0.1	0.12	0.11	0.11		0.09	0.09	0.06	0.06	0.07		0.03	0.03	0.01	0.02	0.01
12 h	0.35	0.35	0.35	0.5	0.6		0.4	0.4	0.4	0.4	0.4		0.25	0.25	0.23	0.25	0.25		0.1	0.18	0.12	0.17	0.18		0.08	0.07	0.075	0.065	0.065		0.055	0.05	0.05	0.05	0.04
24 h	0.6	0.7	0.8	0.8	0.8		0.42	0.42	0.5	0.42	0.47		0.2	0.2	0.25	0.22	0.2		0.15	0.15	0.12	0.1	0.1		0.04	0.04	0.03	0.05	0.05		0.03	0.035	0.03	0.032	0.035
48 h	0.5	0.5	0.53	0.65	0.75		0.3	0.3	0.45	0.5	0.49		0.1	0.11	0.1	0.1	0.1		0.08	0.09	0.08	0.07	0.08		0.02	0.025	0.02	0.02	0.02		0.0015	0.015	0.02	0.02	0.018
